# Supplementary material
Source: publisher figshare collection journal article supplement (https://sage.figshare.com/ndownloader/files/31271575)
Supplement: Supplementary file 1 [file 31271575]

Scribendi Inc.

304-405 Riverview Drive

Chatham, Ontario N7M 0N3 Canada **Receipt**

| **Customer** | Faisal Al Jabr Al Hafuf  Al Hasa  --- Select One ---31982  Saudi Arabia |
| --- | --- |
|  |

Date: Task No.:

2021-09-04 812004 Returned

| **Words** | **Description** | | **TOTAL** |
| --- | --- | --- | --- |
| 2,114 | Academic Proofreading in 7 days Submitted files:  Plastic and Aesthetic Surgery Among Medical Students: A Cross-Sectional Study.pdf | | USD 66.97 |
| Sub Total Shipping | | | USD 66.97 |
| USD 0.00 |
| Tax Rate(s) | | None | USD 0.00 |
|  |  |
| **TOTAL** | | | **USD** **66.97** |

Office use only

| **Payments** | Stripe US$ 66.97  Sat, 04 Sep 2021 13:42:57 GMT |
| --- | --- |
| Methods: Amount: Date: |

***PAID*** ***IN*** ***FULL***

*The* *client* *is* *responsible* *for* *remitting* *all* *local* *taxes* *and* *fees* *to* *the* *relevant* *authorities.*

*Thank* *you* *for* *your* *business!*

*All* *orders* *subject* *to* *our* *terms* *of* *service:* *https://www.scribendi.com/terms*

*GST/HST* *#:* *89219* *5702* *RT0001* *QST* *#:* *1225989199* *TQ0001*
